# Supplementary material
Source: publisher site journal article supplement (https://alpineentomology.pensoft.net/article/30088/download/suppl/31/)
Supplement: Supplementary file 1

**Liste des publications de Charles Lienhard**

**1975**

LIENHARD, C. 1975. Entdeckung des Männchens von *Psoculus neglectus* (Roesler) in Tunesien

(Psocoptera, Mesopsocidae). *Mitteilungen der Schweizerischen Entomologischen Gesellschaft* 48:

239-245.

**1977**

LIENHARD, C. 1977. Die Psocopteren des schweizerischen Nationalparks und seiner Umgebung (Insecta: Psocoptera). *Ergebnisse der wissenschaftlichen Untersuchungen im Schweizerischen Nationalpark* 14(75): 417-551.

**1978**

BIERI, M., DELUCCHI, V. & LIENHARD, C. 1978. Ein abgeänderter Macfadyen-Apparat für die

dynamische

Extraktion

von

Bodenarthropoden.

*Mitteilungen*

*der*

*Schweizerischen*

*Entomologischen Gesellschaft* 51: 119-132.

BIERI, M., DELUCCHI, V. & LIENHARD, C. 1978. Beschreibung von zwei Sonden zur standardisierten Entnahme von Bodenproben für Untersuchungen an Mikroarthropoden. *Mitteilungen der Schweizerischen Entomologischen Gesellschaft* 51: 327-330.

LIENHARD, C. 1978. *Ectopsocopsis cryptomeriae* (Enderlein, 1907) neu für die Schweiz (Psocoptera, Ectopsocidae). *Mitteilungen der Entomologischen Gesellschaft Basel, Neue Folge* 28(1): 6-7.

LIENHARD, C. 1978. Zur historischen Entwicklung des Psocopteren-Systems mit besonderer Berücksichtigung der taxonomischen Bedeutung der Tarsengliederzahl. *Mitteilungen der Schweizerischen Entomologischen Gesellschaft* 51: 419.

**1979**

DETHIER, M., GALLAND, P., LIENHARD, C., MATTHEY, W., ROHRER, N. & SCHIESS, T. 1979. Note préliminaire sur l'étude de la pédofaune dans une pelouse alpine au Parc National Suisse. *Bulletin de la Société suisse de Pédologie* 3: 27-37.

LIENHARD, C. 1979. *Brachypsocus badonneli* n. gen., n. sp., eine neue hemiedaphische Psocoptere aus Südfrankreich (Psocoptera: Amphipsocidae). *Mitteilungen der Schweizerischen Entomologischen Gesellschaft* 52: 83-90.

**1980**

LIENHARD, C. 1980. Beitrag zur Kenntnis der mediterranen *Liposcelis*-Arten (Psocoptera, Liposcelidae). *Mitteilungen der Schweizerischen Entomologischen Gesellschaft* 53: 185-193.

LIENHARD, C. 1980. *Chelyopsocus garganicus* n. gen., n. sp., eine neue lapidicole Psocoptere aus Süditalien (Psocoptera: Troctopsocidae). *Mitteilungen der Schweizerischen Entomologischen Gesellschaft* 53: 209-214.

LIENHARD, C. 1980. Oekologische Untersuchungen im Unterengadin. D. Die Tierwelt ausserhalb des Wassers. 2. Psocopteren (Insecta: Psocoptera). *Ergebnisse der wissenschaftichen Untersuchungen im Schweizerischen Nationalpark* 12(8): 16-33.

LIENHARD, C. 1980. Zur Kenntnis der Collembolen eines alpinen Caricetum firmae im

Schweizerischen Nationalpark. *Pedobiologia* 20: 369-386.

**1981**

LIENHARD, C. 1981. Neue und interessante Psocopteren aus Griechenland, Spanien und Portugal.

*Deutsche Entomologische Zeitschrift, Neue Folge* 28(1-3): 147-163.

LIENHARD, C., DETHIER, M. & SCHIESS, T. 1981. Collemboles et acariens épigés d'une pelouse alpine.

*Revue d'écologie et de biologie du sol* 18(4): 579-601.

MATTHEY, W., DETHIER, M., GALLAND, P., LIENHARD, C., ROHRER, N. & SCHIESS, T. 1981. Etude écologique et biocénotique d'une pelouse alpine au Parc National Suisse. *Bulletin d'Ecologie* 12:

339-353.

1

**1982**

LIENHARD, C. 1982. Les Psoques de nos maisons ou les tours malicieux des appareils Berlese. *Musées de Genève* 222: 16-21.

LIENHARD, C. 1982. Zur Insektenfauna der Umgebung der Vogelwarte Sempach, Kanton Luzern. IX.

Psocoptera (Staubläuse). *Entomologische Berichte Luzern* 8: 65-67.

LIENHARD, C. 1982. Die Insektenfauna des Hochmoores Balmoos bei Hasle, Kanton Luzern. XVII.

Psocoptera (Staubläuse). *Entomologische Berichte Luzern* 7: 81-83.

**1983**

DEHARVENG, L. & LIENHARD, C. 1983. Deux nouvelles espèces du genre *Stachorutes* Dallai, 1973 (Collembola). *Revue suisse de Zoologie* 90(4): 929-934.

LIENHARD, C. 1983. Description d'un nouveau psoque italien et remarques sur la position de *Psocus morio* Latreille. *Bolletino della Società entomologica Italiana, Genova* 115(1-3): 9-14.

LIENHARD, C. 1983. Sur quelques Psocoptères de Madère avec clé de détermination pour les espèces de *Trichopsocus* Kolbe de la région paléarctique occidentale (Insecta: Psocoptera). *Bocagiana* 67:

1-12.

LIENHARD, C. 1983. Die Staubläuse der Region Zürich (Insecta: Psocoptera). *Vierteljahrsschrift der*

*Naturforschenden Gesellschaft in Zürich* 128(2): 115-129.

**1984**

LIENHARD, C. 1984. Études préliminaires pour une faune des Psocoptères de la région ouest-paléarctique - I. Le genre *Cerobasis* Kolbe, 1882 (Psocoptera: Trogiidae). *Revue suisse de Zoologie* 91(3): 747-764.

**1985**

GRAFITTI, G. & LIENHARD, C. 1985. Primi reperti di Psocotteri in grotte della Sardegna (Insecta).

*Bollettino della Società Sarda di Scienze Naturali* 24: 57-60.

LIENHARD, C. 1985. Sur quelques espèces intéressantes de Psocoptères du Bassin Lémanique et du

Valais. *Bulletin Romand d'Entomologie* 3: 73-79.

LIENHARD, C. 1985. Vorarbeiten zu einer Psocopteren-Fauna der Westpaläarktis. II. Die europäischen Arten der Gattung *Elipsocus* Hagen, 1866 (Psocoptera: Elipsocidae). *Mitteilungen der Schweizerischen Entomologischen Gesellschaft* 58: 113-127.

LIENHARD, C. 1985. A new and unusual species of *Ophiodopelma* Enderlein (Insecta, Psocoptera, Pseudocaeciliidae) from Borneo (Sabah, East Malaysia). *Zoologica Scripta* 14(4): 313-317.

**1986**

LIENHARD, C. 1986. Études préliminaires pour une faune des Psocoptères de la région ouest-paléarctique. III. Contribution à la connaissance de la famille des Psocidae (Insecta: Psocoptera). *Revue suisse de Zoologie* 93(2): 297-328.

LIENHARD, C. 1986. Eine neue *Hemineura*-Art aus Spanien (Psocoptera, Elipsocidae). *Mitteilungen der Schweizerischen Entomologischen Gesellschaft* 59: 417-422.

LIENHARD, C. 1986. Beitrag zur Kenntnis der Psocopteren-Fauna Ungarns (Insecta). *Annales*

*Historico-naturales Musei nationalis hungarici* 78: 73-78.

**1987**

BADONNEL, A. & LIENHARD, C. 1987. Description de *Rhinopsocus*, nouveau genre d'Afrique australe

(Psocoptera: Mesopsocidae). *Archives des Sciences* 40: 285-291.

LIENHARD, C. 1987. Inventaire préliminaire des Psoques de Grèce (Insecta: Psocoptera). *Biologia*

*Gallo-Hellenica* 13: 103-106.

LIENHARD, C. 1987. Vier interessante Psocopteren-Arten aus Nordafrika (Psocoptera). *Mitteilungen der Entomologischen Gesellschaft Basel, Neue Folge* 37(1): 47-49.

LIENHARD, C. 1987. Les caricatures hommes-insectes de Grandville. *Musées de Genève* 280: 14-17.

2

LIENHARD, C., BURCKHARDT, D. & HAUSER, B. 1987. An improved beating tray and aspirator for

collecting small arthropods. *Mitteilungen der Schweizerischen Entomologischen Gesellschaft* 60:

107-112.

**1988**

BADONNEL, A. & LIENHARD, C. 1988. Révision de la famille des Mesopsocidae (Insecta, Psocoptera).

*Bulletin du Muséum national d'Histoire naturelle* (4)10(A)(2): 375-412.

LIENHARD, C. 1988. André Badonnel - 90 ans. *Bulletin de la Société entomologique de France* 93(1-

2): 3-11.

LIENHARD, C. 1988. Three new extra-neotropical species of Troctopsocidae (Insecta: Psocoptera).

*Journal of Natural History* 22: 575-587.

LIENHARD, C. 1988. Vorarbeiten zu einer Psocopteren-Fauna der Westpaläarktis. IV. Die Gattung *Prionoglaris* Enderlein (Psocoptera: Prionoglarididae). *Mitteilungen der Schweizerischen Entomologischen Gesellschaft* 61: 89-108.

LIENHARD, C. 1988. Quelques espèces inédites de Mesopsocidae (Insecta: Psocoptera) avec redescription de *Hexacyrtoma capensis* Enderlein. *Revue suisse de Zoologie* 95(2): 353-376.

LIENHARD, C. 1988. Contributions to a revision of the western Palaearctic psocids. V. The genus

*Nephax*

Pearman

(Psocoptera:

Amphientomidae).

*Mitteilungen*

*der*

*Schweizerischen*

*Entomologischen Gesellschaft* 61: 365-372.

LIENHARD, C. & BURCKHARDT, D. 1988. Zum 60. Geburtstag von Prof. Dr. Willi Sauter. *Mitteilungen der Schweizerischen Entomologischen Gesellschaft* 61: 9-10.

LIENHARD, C. & HALPERIN, J. 1988. Preliminary list of Psocoptera from Israel with description of two new species. *Israel Journal of Entomology* 22: 13-25.

**1989**

LIENHARD, C. 1989. Zwei interessante europäische *Lachesilla*-Arten (Psocoptera: Lachesillidae).

*Mitteilungen der Schweizerischen Entomologischen Gesellschaft* 62: 307-314.

**1990**

LIENHARD, C. 1990. Revision of the Western Palaearctic species of *Liposcelis* Motschulsky

(Psocoptera: Liposcelididae). *Zoologische Jahrbücher (Abteilung Systematik)* 117: 117-174.

LIENHARD, C. 1990. A new Oriental species of Troctopsocidae (Insecta: Psocoptera). *Revue suisse de*

*Zoologie* 97(2): 339-344.

LIENHARD, C. 1990. New records and synonymies in western Palaearctic Psocoptera. *Deutsche*

*Entomologische Zeitschrift, Neue Folge* 37(4-5): 205-212.

NAYROLLES, P. & LIENHARD, C. 1990. Description d'une nouvelle espèce de *Prorastriopes* de Suisse

(Collembola Symphypleona). *Revue suisse de Zoologie* 97(3): 623-628.

**1991**

LIENHARD, C. 1991. New records and species of *Belaphopsocus* (Psocoptera: Liposcelididae). *Raffles*

*Bulletin of Zoology* 39(1): 75-85.

**1992**

SMITHERS, C. N. & LIENHARD, C. 1992. A revised bibliography of the Psocoptera (Arthropoda: Insecta). *Technical Reports of the Australian Museum* 6: 1-86.

**1993**

LIENHARD, C. & SCHNEIDER, N. 1993. *Dorypteryx longipennis* Smithers, un psoque domicole nouveau pour l'Europe (Psocoptera: Psyllipsocidae). *Bulletin et Annales de la Société royale belge d'Entomologie* 129: 129-137.

**1994**

BADONNEL, A. & LIENHARD, C. 1994. Psocoptera (pp. 301-305). *In*: JUBERTHIE, C. & DECU, V. (eds). Encyclopaedia Biospeologica, tome I, XII + 834 pp. *Société de Biospéologie, Moulis.*

3

CUENOUD, P. & LIENHARD, C. 1994. Les Psocoptères du Bassin Genevois. *Bulletin romand*

*d'Entomologie* 12: 7-41.

LIENHARD, C. 1994. Staubläuse (Psocoptera) - ungebetene Gäste in Haus und Vorrat. *Mitteilungen der*

*Entomologischen Gesellschaft Basel, Neue Folge* 44: 122-160.

LIENHARD, C. 1994. Hundert Jahre Insektensystematik am Beispiel der Psocopteren. *Revue suisse de*

*Zoologie* 101(4): 853-854.

**1995**

LIENHARD, C. 1995. Psocoptères (Psocoptera) nouveaux ou peu connus d'Italie, de Chypre et du

Yémen. *Mitteilungen der Schweizerischen Entomologischen Gesellschaft* 68: 335-361.

SCHNEIDER, N. & LIENHARD, C. 1995. Psocoptera (Part 38: 6 pp.). *In:* MINELLI, A., RUFFO, S. & LA

POSTA, S. (eds). Checklist delle specie della fauna italiana. *Calderini, Bologna.*

**1996**

LIENHARD, C. 1996. Les Psocoptères au Muséum. *Musées de Genève* 341: 2-8.

LIENHARD, C. 1996. Psocoptères nouveaux ou peu connus de quelques îles atlantiques (Canaries, Madère, Açores, Ascension) et de l'Afrique du Nord (Insecta: Psocoptera). *Boletim do Museu municipal do Funchal (Historia Natural)* 48(267): 87-151.

**1997**

LIENHARD, C. & MOCKFORD, E. L. 1997. New taxa and records of Troctopsocidae (Psocoptera).

*Mitteilungen der Schweizerischen Entomologischen Gesellschaft* 70: 361-385.

YOSHIZAWA, K. & LIENHARD, C. 1997. A new genus, *Idatenopsocus*, of the family Mesopsocidae

(Insecta: Psocoptera) and its phylogenetic position. *Species diversity* 2: 51-58.

**1998**

LIENHARD, C. 1998. Psocoptères euro-méditerranéens. *Faune de France* 83: XX+517 pp.

LIENHARD, C. 1998. Interessantes aus der Welt der Psocopteren*. Mitteilungen der Schweizerischen*

*Entomologischen Gesellschaft* 71(1-2): 252-253.

**1999**

LIENHARD, C. & ASHMOLE, N. P. 1999. *Sphaeropsocopsis myrtleae* sp. n., a blind subterranean psocid from St Helena (Psocoptera: Sphaeropsocidae). *Revue suisse de Zoologie* 106(4): 905-912.

**2000**

LIENHARD, C. 2000. A new desert psocid from Namibia (Insecta: Psocoptera: Trogiidae). *Revue suisse de Zoologie* 107(2): 277-281.

LIENHARD, C. 2000. A new genus of Prionoglarididae from a Namibian cave (Insecta: Psocoptera).

*Revue suisse de Zoologie* 107(4): 871-882.

**2002**

LIENHARD, C. 2002. Three extraordinary new species of Psocoptera (Insecta) from Colombia, Malaysia and Thailand (Epipsocidae, Lachesillidae, Ectopsocidae). *Revue Suisse de Zoologie*

109(2): 383-395.

LIENHARD, C. 2002. Deux psoques intéressants de Corse (Psocoptera: Caeciliusidae) avec une liste des espèces ouest-paléarctiques de la famille. *Revue Suisse de Zoologie* 109 (4): 687-694.

LIENHARD, C. 2002. Cave psocids. *Psocid News* 3: 3-5.

LIENHARD, C. & KANERVO, J. 2002. Redescription of *Psocus flavonimbatus* Rostock (Psocoptera: Psocidae) from Finland. *Entomologica Fennica* 13(1): 58-62.

LIENHARD, C. & SMITHERS, C.N. 2002. Psocoptera (Insecta): World Catalogue and Bibliography.

*Instrumenta Biodiversitatis* 5: xli+745 pp. *Muséum d'histoire naturelle, Genève.*

**2003**

4

LIENHARD, C. 2003. Additions and Corrections (Part 1) to Lienhard & Smithers, 2002: "Psocoptera

(Insecta) - World Catalogue and Bibliography". *Psocid News* 4: 2-24.

LIENHARD, C. 2003. Additions and Corrections (Part 2) to Lienhard & Smithers, 2002: "Psocoptera

(Insecta) - World Catalogue and Bibliography". *Psocid News* 5: 2-37.

LIENHARD, C. 2003. (Book review). *Systematic Entomology* 28(2): 275. (Review of Li Fasheng, 2002: Psocoptera of China).

LIENHARD, C. 2003. Nomenclatural amendments concerning Chinese Psocoptera (Insecta), with remarks on species richness. *Revue suisse de Zoologie* 110(4): 695-721.

LIENHARD, C. 2003. Verzeichnis der Staubläuse (Psocoptera) Deutschlands (pp. 54-71). *In*: KLAUSNITZER, B. (ed.). Entomofauna Germanica, vol. 6. *Entomologische Nachrichten und Berichte, Dresden, Beiheft* 8.

LIENHARD, C. & SCHWENDINGER, P. 2003. Les 50 ans du Département des Arthropodes et d'Entomologie I (ARTO). *Carnet du Muséum* 11: 10-18. *Muséum d'histoire naturelle de la Ville de Genève.*

**2004**

GARCIA ALDRETE, A. N., LIENHARD, C. & MOCKFORD, E. L. (eds) 2004. Thorntoniana, a commemorative volume for Ian W. B. Thornton (1926-2002). *Publicaciones Especiales del Instituto de Biologia* 20, *Universidad Nacional Autonoma de Mexico, Mexico,* 205 pp.

LIENHARD, C. 2004. Additions and Corrections (Part 3) to Lienhard & Smithers, 2002: "Psocoptera

(Insecta) - World Catalogue and Bibliography". *Psocid News* 6: 1-23.

LIENHARD, C. 2004. *Siamoglaris zebrina* gen. n., sp. n., the first representative of Prionoglarididae from the Oriental Region (Insecta: Psocoptera). *Revue suisse de Zoologie* 111(4): 865-875.

LIENHARD, C. 2004. New Myopsocidae (Insecta: Psocoptera) from Southeast Asia, with redescription of *Lophopterygella camelina* Enderlein (pp. 169-205). *In*: GARCIA ALDRETE, A. N., LIENHARD, C.

& MOCKFORD, E. L. (eds). Thorntoniana, a commemorative volume for Ian W. B. Thornton (1926-2002). *Publicaciones Especiales del Instituto de Biologia* 20, *Universidad Nacional Autonoma de Mexico, Mexico,* 205 pp.

LIENHARD, C. & BAZ, A. 2004. On some interesting psocids (Insecta: Psocoptera) from European Macaronesia (pp. 79-97). *In*: GARCIA ALDRETE, A. N., LIENHARD, C. & MOCKFORD, E. L. (eds). Thorntoniana, a commemorative volume for Ian W. B. Thornton (1926-2002). *Publicaciones Especiales del Instituto de Biologia* 20, *Universidad Nacional Autonoma de Mexico, Mexico,* 205 pp.

YOSHIZAWA, K. & LIENHARD, C. 2004. Systematics of *Trichadenotecnum* (Psocoptera: Psocidae) in Hong Kong (pp. 121-149). *In*: GARCIA ALDRETE, A. N., LIENHARD, C. & MOCKFORD, E. L. (eds). Thorntoniana, a commemorative volume for Ian W. B. Thornton (1926-2002). *Publicaciones Especiales del Instituto de Biologia* 20, *Universidad Nacional Autonoma de Mexico, Mexico,* 205 pp.

**2005**

LIENHARD, C. 2005. Additions and Corrections (Part 4) to Lienhard & Smithers, 2002: "Psocoptera

(Insecta) - World Catalogue and Bibliography". *Psocid News* 7: 1-16.

LIENHARD, C. 2005. Description of a new beetle-like psocid (Insecta: Psocoptera: Protroctopsocidae)

from Turkey showing an unusual sexual dimorphism. *Revue suisse de Zoologie* 112(2): 333-349.

LIENHARD, C. 2005. Two new soil-dwelling psocids (Psocoptera: Trogiidae and Pachytroctidae) from the islands of St Helena and Madagascar. *Revue suisse de Zoologie* 112(3): 689-701.

LIENHARD, C. 2005. Staubläuse, Rindenläuse (Psocoptera) – 7 Arten (p. 269). *In*: PAGITZ, K., HUEMER, P. & JEDINGER, A. **(**eds**)**. GEO-Tag der Artenvielfalt 2005 in Tirol – Erhebungen im Naturpark Kaunergrat. *Berichte des naturwissenschaftlich-medizinischen Vereins in Innsbruck* 92:

243-348.

5

LIENHARD, C. & GARCIA, A. 2005. Psocoptera (p. 70). *In*: ARECHAVALETA, M., ZURITA, N.,

MARRERO, M. C. & MARTIN, J. L. (eds). Lista preliminar de especies silvestres de Cabo Verde: hongos, plantas y animales terrestres, 2005. *Consejeria de Medio Ambiente y Ordenacion Territorial, Gobierno de Canarias,* 155 pp.

YOSHIZAWA, K., LIENHARD, C. & IDRIS, A. B. 2005. On the systematic position of *Podopterocus* Banks and *Dinopsocus* Banks, with a revised diagnosis of the genus *Sigmatoneura* Enderlein (Psocodea: 'Psocoptera': Psocidae). *Revue suisse de Zoologie* 112(4): 831-848.

**2006**

BESS, E., SMITH, V., LIENHARD, C. & JOHNSON, K. P. 2006. Psocodea: Parasitic Lice (= Phthiraptera), Book Lice, and Bark Lice. Version 08 October 2006 (under construction).

[<http://tolweb.org/Psocodea/8235/2006.10.08](http://tolweb.org/Psocodea/8235/2006.10.08)>.

[<http://tolweb.org/](http://tolweb.org/)>

*In*:

The

Tree

of

Life

Web

Project,

LIENHARD, C. 2006. Additions and Corrections (Part 5) to Lienhard & Smithers, 2002: "Psocoptera

(Insecta) - World Catalogue and Bibliography". *Psocid News* 8: 1-18.

LIENHARD, C. 2006. Four interesting psocids (Psocodea: 'Psocoptera') from European parts of Russia and from the eastern Mediterranean. *Revue suisse de Zoologie* 113(4): 807-815.

LIENHARD, C. 2006. Book review: Psocids, Psocoptera (booklice and barklice), Handbooks for the Identification of British Insects, Vol. 1, Part 7 (2nd edition, 2005), by T. R. New. *Systematic Entomology* 31(4): 729-730.

WANG ZI-YING, WANG JIN-JUN & LIENHARD, C. 2006. Two new species of *Liposcelis* (Psocoptera, Liposcelididae) from China. *Acta Zootaxonomica Sinica* 31(3): 564-568.

YOSHIZAWA, K., LIENHARD, C. & JOHNSON, K. P. 2006. Molecular systematics of the suborder

Trogiomorpha (Insecta: Psocodea: 'Psocoptera'). *Zoological Journal of the Linnean Society* 146:

287-299.

**2007**

LIENHARD, C. 2007. Additions and Corrections (Part 6) to Lienhard & Smithers, 2002: "Psocoptera

(Insecta) - World Catalogue and Bibliography". *Psocid News* 9: 1-17.

LIENHARD, C. 2007. Description of a new African genus and a new tribe of Speleketorinae (Psocodea:

'Psocoptera': Prionoglarididae*). Revue suisse de Zoologie* 114(3): 441-469.

NEW, T. R. & LIENHARD, C. 2007. The Psocoptera of tropical South-east Asia. *Fauna Malesiana*

*Handbooks* 6, IX + 290 pp.

YOSHIZAWA, K., LIENHARD, C. & THAPA, V. K. 2007. Systematic study of the genus

*Trichadenotecnum* in Nepal (Psocodea: 'Psocoptera': Psocidae). *Insecta Matsumurana, New Serie*s

63: 1-33.

**2008**

LIENHARD, C. 2008. Order Psocoptera (pp. 104-132). *In*: VAN HARTEN, A. (ed.). Arthropod fauna of the United Arab Emirates, vol. 1, 754 pp. *Dar Al Ummah Printing, Abu Dhabi, UAE.*

LIENHARD, C. 2008. Additions and Corrections (Part 7) to Lienhard & Smithers, 2002: "Psocoptera

(Insecta) - World Catalogue and Bibliography". *Psocid News* 10: 1-18.

LIENHARD, C. 2008. Découverte d’étonnants fossiles vivants. *Muséum & Co., Journal du Muséum d’histoire naturelle et du Musée d’histoire des sciences, Genève*, no. 3: 2-4.

LIENHARD, C. 2008. Two unusual new psocids from Vietnam (Psocodea: 'Psocoptera': Caeciliusidae and Psocidae). *Revue suisse de Zoologie* 115(3): 497-508.

**2009**

JOHNSON, K. P., SMITH, V. S., EADES, D. C., BESS, E. & LIENHARD, C. 2009. Psocodea species file online. Version 1.1/3.5. [<http://Psocodea.SpeciesFile.org](http://Psocodea.SpeciesFile.org/)>

LIENHARD, C. 2009. Additions and Corrections (Part 8) to Lienhard & Smithers, 2002: "Psocoptera

(Insecta) - World Catalogue and Bibliography". *Psocid News* 11: 2-16.

6

LIENHARD, C. 2009. Order Psocoptera, Part 2 (pp. 49-60). *In*: VAN HARTEN, A. (ed.). Arthropod fauna

of the United Arab Emirates, vol. 2. *Dar Al Ummah Printing, Abu Dhabi, UAE.*

LIENHARD, C. 2009. Psocoptera (Staubläuse) (pp. 603-605). *In*: RABITSCH, W. & ESSL, F. (Eds).

Endemiten – Kostbarkeiten in Oesterreichs Pflanzen- und Tierwelt. *Naturwissenschaftlicher*

*Verein für Kärnten und Umweltbundesamt, Klagenfurt und Wien,* 923 pp.

**2010**

KUCEROVA, Z. & LIENHARD, C. 2010. Faunistic records from the Czech Republic 299. Psocoptera.

*Klapalekiana* 46: 225-226.

LIENHARD, C. 2010. Additions and Corrections (Part 9) to Lienhard & Smithers, 2002: "Psocoptera

(Insecta) - World Catalogue and Bibliography". *Psocid News* 12: 2-18.

LIENHARD, C., HOLUSA, O. & GRAFITTI, G. 2010. Two new cave-dwelling Prionoglarididae from

Venezuela and Namibia (Psocodea: 'Psocoptera': Trogiomorpha). *Revue suisse de Zoologie*

117(2): 185-197.

LIENHARD, C., OLIVEIRA DO CARMO, T. & LOPES FERREIRA, R. 2010. A new genus of Sensitibillini from Brazilian caves (Psocodea: 'Psocoptera': Prionoglarididae). *Revue suisse de Zoologie* 117(4):

611-635.

YOSHIZAWA, K. & LIENHARD, C. 2010. In search of the sister group of the true lice: A systematic review of booklice and their relatives, with an updated checklist of Liposcelididae (Insecta: Psocodea). *Arthropod Systematics & Phylogeny* 68(2): 181-195.

**2011**

GÜNTHER, K. K. & LIENHARD, C. 2011. Psocoptera – Staubläuse (pp. 143-155). *In*: KLAUSNITZER, B. (ed.). Exkursionsfauna von Deutschland. Vol. 2 (Wirbellose: Insekten). 11., neu bearbeitete und erweiterte Auflage. *Spektrum Akademischer Verlag Heidelberg,* 976 pp.

HOLLIER, J., LIENHARD, C. & RAMEL, G. 2011. The Psocoptera of the Wetland Kerkini Nature

Reserve, with eight species new for Greece. *Entomologist's Monthly Magazine* 147: 89-91. LIENHARD, C. 2011. Additions and Corrections (Part 10) to Lienhard & Smithers, 2002: "Psocoptera

(Insecta) - World Catalogue and Bibliography". *Psocid News* 13: 1-18.

LIENHARD, C. 2011. A new species of *Siamoglaris* from Thailand with complementary description of the type species (Psocodea: 'Psocoptera': Prionoglarididae). *Revue suisse de Zoologie* 118(2):

293-306.

LIENHARD, C. & ASHMOLE, N. P. 2011. The Psocoptera (Insecta: Psocodea) of St Helena and

Ascension Island (South Atlantic) with a new record from South Africa. *Revue suisse de Zoologie*

118(3): 423-449.

LIENHARD, C. & BAZ, A. 2011. Redescription of the genus *Marcenendius* Navas (Psocodea:

'Psocoptera': Amphientomidae) with a key to western Palaearctic amphientomids. *Revue suisse de*

*Zoologie* 118(3): 451-466.

VARKONYI, G. & LIENHARD, C. 2011. Taxonomy, habitat choice and distribution of *Kimunpsocus flavonimbatus* (Rostock, 1879) comb. n. (Psocodea: 'Psocoptera': Psocidae). *Entomologica*

*Fennica* 22: 97-105.

**2012**

KUCEROVA, Z., LI, Z.-H., KALINOVIC, I., YANG, Q.-Q., HROMADKOVA, J. & LIENHARD, C. 2012. The external morphology of females, males and eggs of a *Liposcelis silvarum* (Insecta: Psocodea: Liposcelididae) strain with unusually developed compound eyes, visualised with scanning electron microscopy. *Italian Journal of Zoology* 79(3): 402-409.

LIENHARD, C. 2012. Additions and Corrections (Part 11) to Lienhard & Smithers, 2002: "Psocoptera

(Insecta) - World Catalogue and Bibliography". *Psocid News* 14: 1-13.

LIENHARD, C. 2012. Psocoptera (pp. 53-55). *In*: MERZ, B. (ed.). Liste annotée des insectes (Insecta)

du canton de Genève. *Instrumenta Biodiversitatis* VIII: 1-532. Genève.

LIENHARD, C. 2012. A new species of *Austropsocus* (Psocodea: 'Psocoptera': Pseudocaeciliidae) with a peculiar forewing venation from New Caledonia. *Revue suisse de Zoologie* 119(2): 161-167.

7

LIENHARD, C., FERREIRA, R. L., GNOS, E., HOLLIER, J., EGGENBERGER, U. & PIUZ, A. 2012.

Microcrystals coating the wing membranes of a living insect (Psocoptera: Psyllipsocidae) from a

Brazilian cave. *Scientific Reports* 2, 408; DOI:10.1038/srep00408.

**2013**

LIENHARD, C. 2013. Additions and Corrections (Part 12) to Lienhard & Smithers, 2002: "Psocoptera

(Insecta) - World Catalogue and Bibliography". *Psocid News* 15: 1-21.

LIENHARD, C. & FERREIRA, R. L. 2013. A new species of *Neotrogla* from Brazilian caves (Psocodea:

'Psocoptera': Prionoglarididae). *Revue suisse de Zoologie* 120(1): 3-12.

LIENHARD, C. & FERREIRA, R. L. 2013. Three new species of *Psyllipsocus* (Psocodea: 'Psocoptera': Psyllipsocidae) from Brazilian caves with description of a novel structure interpreted as a male

accessory genital organ. *Revue suisse de Zoologie* 120(3): 421-443.

MOCKFORD, E. L., LIENHARD, C. & YOSHIZAWA, K. 2013. Revised classification of 'Psocoptera' from

Cretaceous amber, a reassessment of published information. *Insecta Matsumurana,* New Series

69: 1-26.

**2014**

KUCEROVA, Z., WAKIL, W., YASIN, M., YANG, Q., LI, Z.-H., HROMADKOVA, J., KALINOVIC, I., OPIT, G. & LIENHARD, C. 2014. Morphological and molecular characterization of a Pakistan strain of

the stored-product pest *Liposcelis paeta* (Insecta: Psocodea: Liposcelididae) with observations on the variability of the head surface sculpture in liposcelidids. *Journal of Stored Products Research*

57: 12-23.

LIENHARD, C. 2014. Additions and corrections (part 13) to Lienhard & Smithers, 2002: "Psocoptera

(Insecta) - World Catalogue and Bibliography". *Psocid News* 16: 1-20.

LIENHARD, C. & FERREIRA, R. L. 2014. New species of *Psyllipsocus* from Brazilian caves (Psocodea:

'Psocoptera': Psyllipsocidae). *Revue suisse de Zoologie* 121(2): 211-246.

YOSHIZAWA, K., FERREIRA, R. L., KAMIMURA, Y. & LIENHARD, C. 2014. Female penis, male vagina, and their correlated evolution in a cave insect. *Current Biology* 24(9): 1006-1010.

YOSHIZAWA, K., FERREIRA, R. L., KAMIMURA, Y. & LIENHARD, C. 2014. A transgender Brazilian

cave insect. *The Winnower*, September 03, 2014, 3 pp. DOI: 10.15200/winn.140978.89418. YOSHIZAWA, K., LIENHARD, C. & IDRIS ABD. GHANI, I. A. 2014. *Trichadenotecnum* species from

Peninsular Malaysia and Singapore (Insecta: Psocodea: 'Psocoptera': Psocidae). *Zootaxa* 3835(4):

469-500.

**2015**

LIENHARD, C. 2015. Additions and Corrections (Part 14) to Lienhard & Smithers, 2002: "Psocoptera

(Insecta) - World Catalogue and Bibliography". *Psocid News* 17: 1-17.

LIENHARD, C. & FERREIRA, R. L. 2015. Review of Brazilian cave psocids of the families Psyllipsocidae and Prionoglarididae (Psocodea: 'Psocoptera': Trogiomorpha) with a key to the South American species of these families. *Revue suisse de Zoologie* 122(1): 121-142.

LIENHARD, C. & MIFSUD, D. 2015. Psocids from Malta (Insecta: Psocodea: 'Psocoptera'), with new synonymy for *Peripsocus stagnivagus* based on the discovery of its first Palaearctic male.

*Zootaxa* 3936(2): 251-260.

YOSHIZAWA, K. & LIENHARD, C. 2015. Synonymy of *Cryptopsocus* Li with *Trichadenotecnum*

Enderlein (Insecta: Psocodea: 'Psocoptera': Psocidae) and description of three new species.

*Zootaxa* 3957(4): 480-488.

YOSHIZAWA, K. & LIENHARD, C. 2015. The *alinguum* group, a new species group of the genus

*Trichadenotecnum*, with descriptions of two new species from Thailand (Psocodea: 'Psocoptera': Psocidae). *Insecta Matsumurana, New Series* 71: 179-188.

YOSHIZAWA, K., YAO, I. & LIENHARD, C. 2015. Molecular phylogeny reveals genital convergences and reversals in the barklouse genus *Trichadenotecnum* (Insecta: Psocodea: 'Psocoptera': Psocidae). *Molecular Phylogenetics and Evolution* 94 (2016): 358-364 [available online 3

October 2015].

**2016**

LIENHARD, C. 2016. Additions and Corrections (Part 15) to Lienhard & Smithers, 2002: "Psocoptera

(Insecta) - World Catalogue and Bibliography". *Psocid News* 18: 1-12.

8

LIENHARD, C. 2016. Country checklists of the Psocoptera species of the World, extracted from

Lienhard & Smithers, 2002: "Psocoptera (Insecta) – World Catalogue and Bibliography". *Psocid*

*News*, Special Issue 1: 1-123.

LIENHARD, C. 2016. Subject bibliography for papers on Psocoptera published between the years 1688 and 2015. *Psocid News*, Special Issue 2: 1-40.

LIENHARD, C. 2016. Synthesis of Parts 1-10 of the Additions and Corrections to Lienhard & Smithers,

2002: "Psocoptera (Insecta) – World Catalogue and Bibliography". *Psocid News*, Special Issue 3:

1-221.

LIENHARD, C. & GARCIA ALDRETE, A. N. 2016. An extraordinary new species of *Psyllipsocus* (Psocodea: 'Psocoptera': Psyllipsocidae) from the Biosphere Reserve Sierra de Huautla, Morelos, Mexico. *Revue suisse de Zoologie* 123(1): 105-112.

LIENHARD, C. & MIFSUD, D. 2016. Three new psocids (Insecta, Psocodea, 'Psocoptera') for the

Maltese fauna. *Bulletin of the Entomological Society of Malta* 8: 94-95.

LIENHARD, C., HOLLIER, J. & SCHWENDINGER, P. 2016. Dr Bernd Hauser, honorary curator at the Muséum d'histoire naturelle de Genève, is 80. *Mitteilungen der Schweizerischen Entomologischen Gesellschaft* 89: 289-292.

YOSHIZAWA, K. & LIENHARD, C. 2016. Bridging the gap between chewing and sucking in the hemipteroid insects: new insights from Cretaceous amber. *Zootaxa* 4079(2): 229-245.

**2017**

LIENHARD, C. 2017. Additions and Corrections (Part 16) to Lienhard & Smithers, 2002: "Psocoptera

(Insecta) - World Catalogue and Bibliography". *Psocid News* 19: 1-18.

LIENHARD, C., TELFER, M. G. & ANDERSON, R. 2017. *Chilenocaecilius ornatipennis* (Blanchard,

1851) (Psocodea: 'Psocoptera', Paracaeciliidae) in Ireland, first Palaearctic record of this South

American genus and species. *Entomologist's Monthly Magazine* 153: 25-30.

**2018**

LIENHARD, C. 2018. Additions and Corrections (Part 17) to Lienhard & Smithers, 2002: "Psocoptera

(Insecta) - World Catalogue and Bibliography". *Psocid News* 20: 4-17.

LIENHARD, C. & YOSHIZAWA, K. 2018. Authorities for family-group names of Trogiomorpha

(Insecta: Psocodea: 'Psocoptera'). *Psocid News* 20: 1-3.

YOSHIZAWA, K., KAMIMURA, Y., LIENHARD, C., FERREIRA, R. L. & BLANKE, A. 2018*.*

A biological switching valve evolved in the female of a sex-role reversed cave insect to receive multiple sperm packages. *eLife* 2018;7:e39563 doi: 10.7554/eLife.39563.

YOSHIZAWA, K., FERREIRA, R. L., YAO, I., Lienhard, C. & KAMIMURA, Y. *in press*.

Independent origins of female penis and its

(Psocodea: Prionoglarididae). *Biology Letters*

coevolution

with

male

vagina

in

cave

insects

9
